# Supplementary material for: β-Glucans (Saccharomyces cereviseae) Reduce Glucose Levels and Attenuate Alveolar Bone Loss in Diabetic Rats with Periodontal Disease
Source: PLoS One. 2015 Aug 20;10(8):e0134742. doi: 10.1371/journal.pone.0134742 (PMC4546386; doi:10.1371/journal.pone.0134742)
Supplement: S3 Table — (DOCX) [file pone.0134742.s006.docx]

**S3 Table:** Alveolar bone loss (mm - mean ± standard deviation) in animals treated with β-glucans from *Saccharomyces cerevisiae* (30mg/kg/day) during 28 days

| DIABETES | PERIODONTAL DISEASE | β-GLUCANS | |
| --- | --- | --- | --- |
| Without | With |
| Without | Without | 1,20 (0,14) a | 0,98 (0,12) a |
| With | 2,10 (0,36) b A x | 1,78 (0,35) b A y |
| With | Without | 1,16 (0,10) a | 1,13 (0,13) a |
| With | 2,63 (0,13) b B x | 2,10 (0,36) b B y |

A,B Means followed by different letters in columns indicate significant differences between groups with and without diabetes by F test (p < 0,05)

a,b Means followed by different letters in columns indicate significant differences between groups with and without periodontal disease by F test (p < 0,05)

x,y Means followed by different letters in lines indicate significant differences between groups with and without β-glucan ingestion by F test (p < 0,05)
